# Supplementary material
Source: PubMed Central journal article supplement (PMC5101152)

Suppl Figure 1.

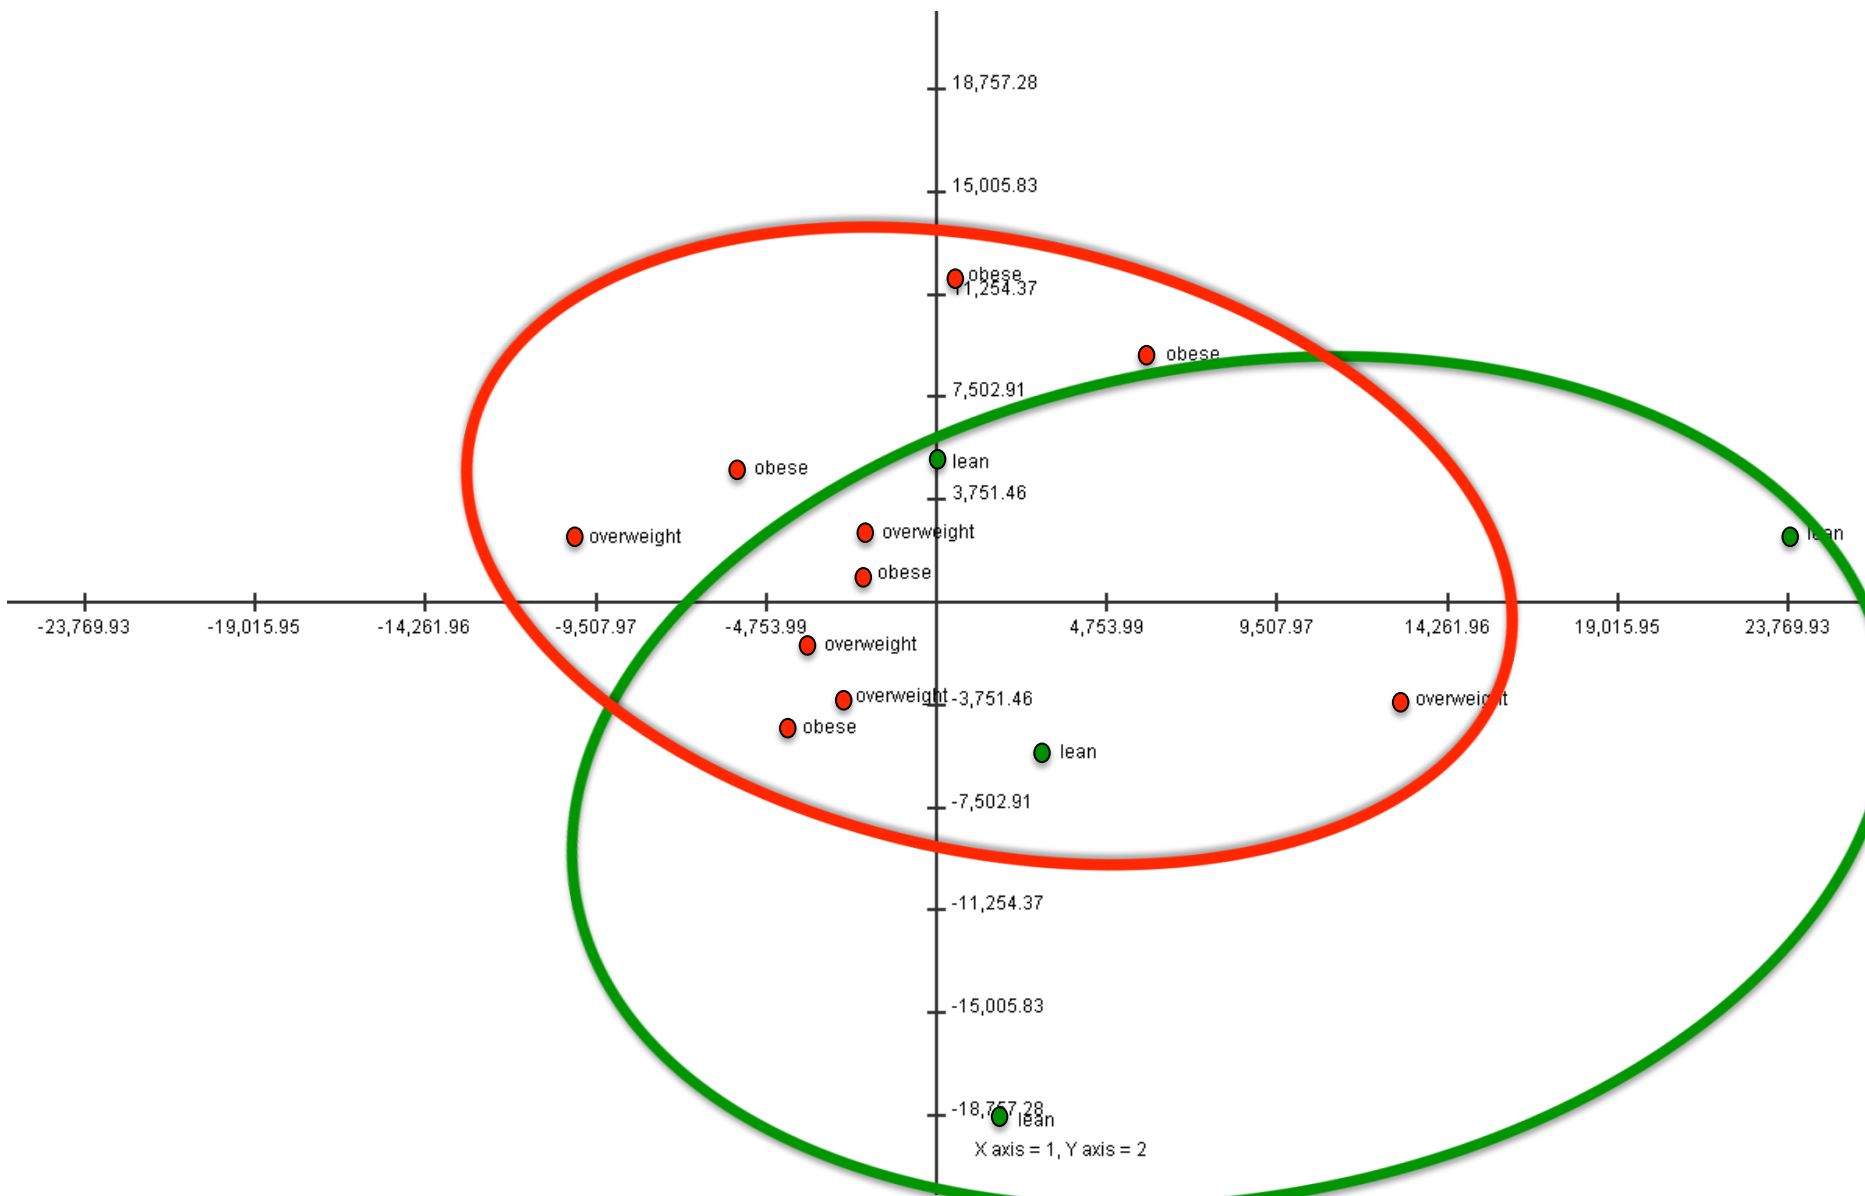

Supplement: NIHMS800476-supplement-5.pdf [file NIHMS800476-supplement-5.pdf]

**A. Mitochondrial genes**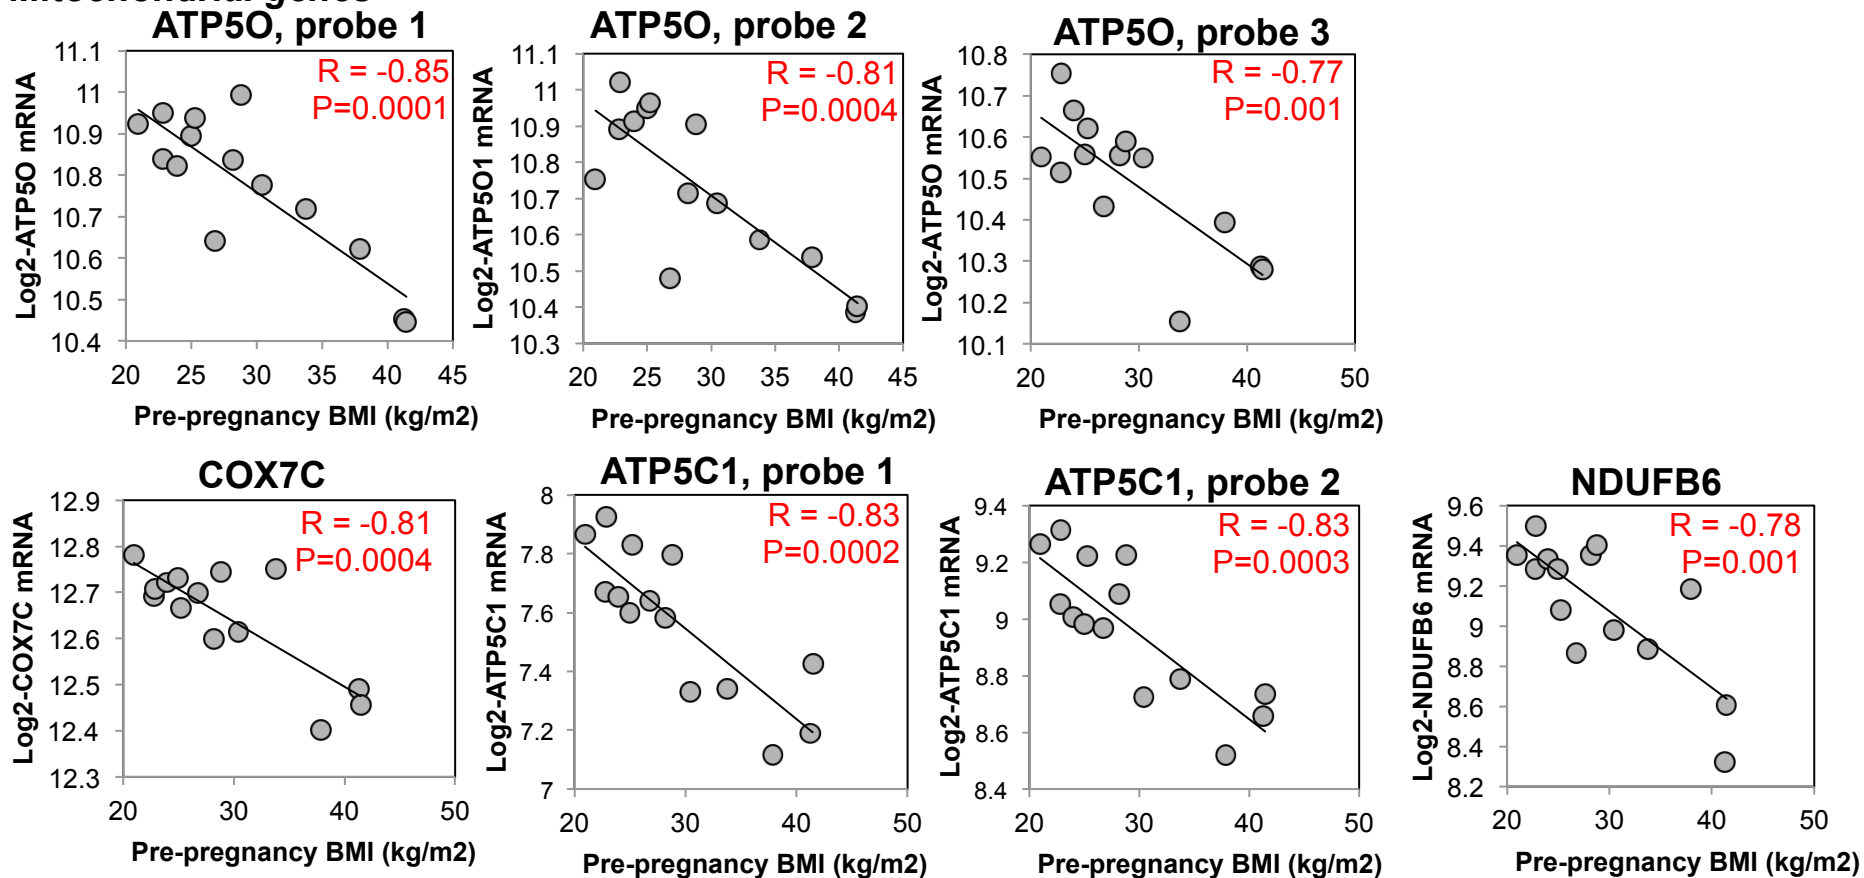**B. Lipid metabolism genes**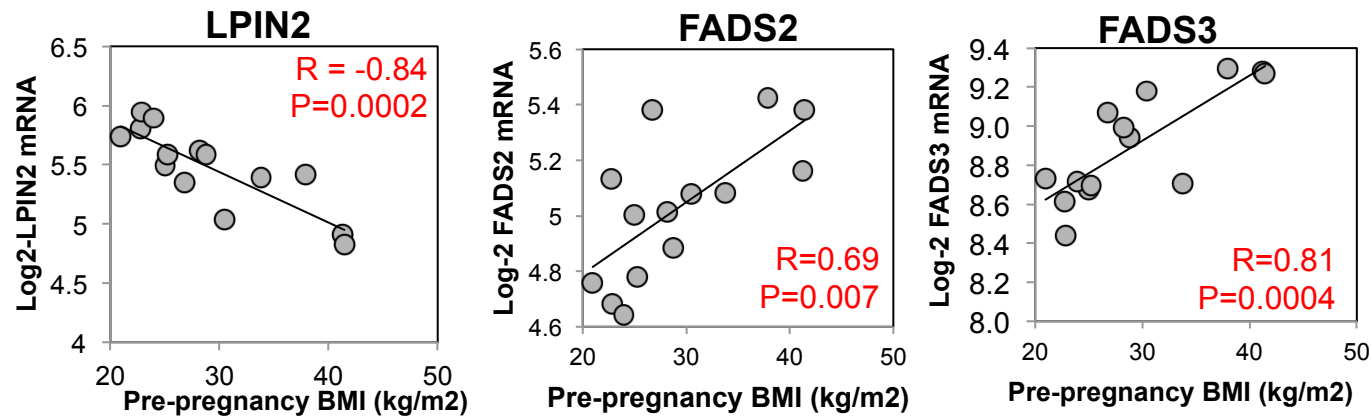

Supplement: NIHMS800476-supplement-6.pdf [file NIHMS800476-supplement-6.pdf]

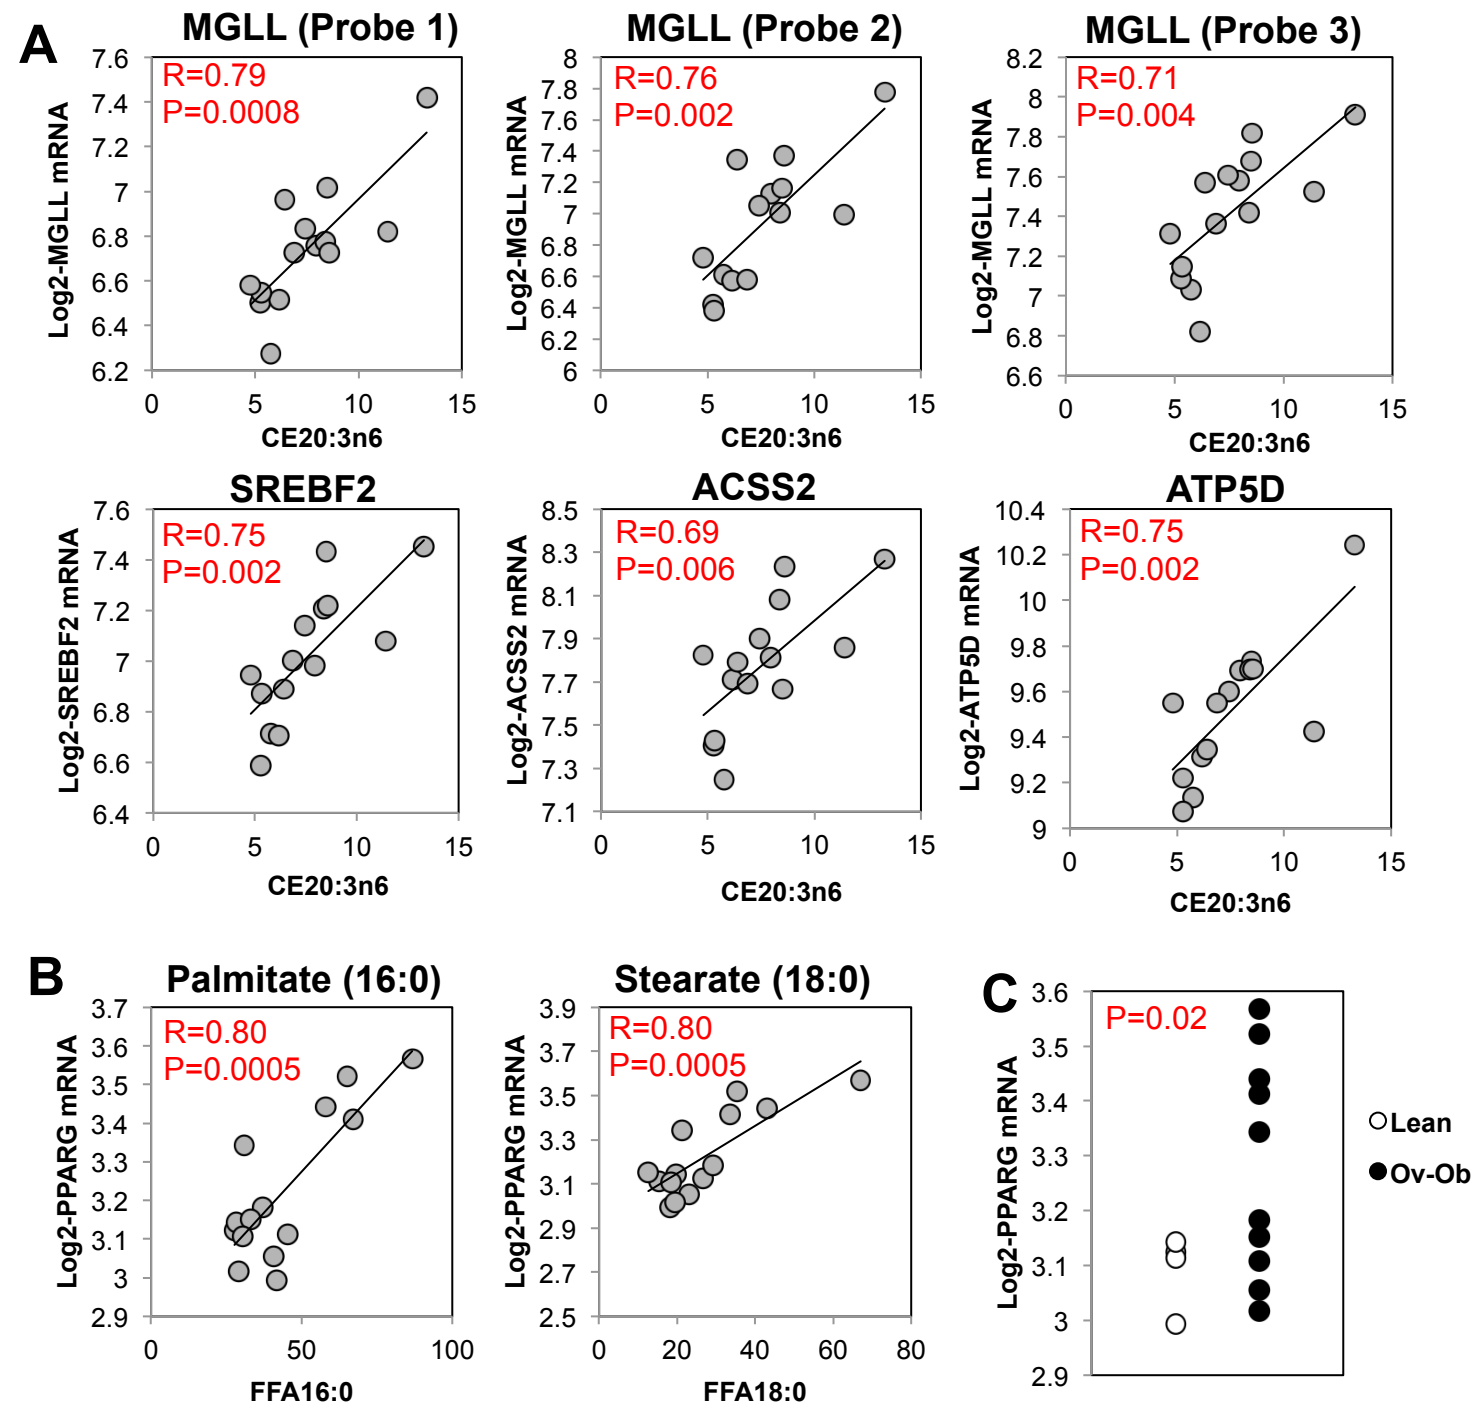

Supplement: NIHMS800476-supplement-7.pdf [file NIHMS800476-supplement-7.pdf]
